# Supplementary material
Source: publisher site journal article supplement (https://www.dovepress.com/article/318737)
Supplement: Supplementary file 1 [file get_supplementary_file.php]

**Second primary cancers after liver, gallbladder and bile duct cancers, and these cancers as second primary cancers**

Guoqiao Zheng 1,2,3, Kristina Sundquist3,4,5, Jan Sundquist3,4,5, Tianhui Chen6, Asta Försti1.3,7,8, Akseli Hemminki 9,10, Vaclav Liska11,12 and Kari Hemminki 1,2,3,12

Supplementary Table 1. Male risks of SPCs after hepatobiliary cancers and these cancers as SPCs

| Subtype | Cancer site | SPC after hepatobiliary cancer | | | | hepatobiliary cancer as SPC | | | |
| --- | --- | --- | --- | --- | --- | --- | --- | --- | --- |
| N | SIR | 95% CI | | N | SIR | 95% CI | |
| HCC | UAT | 5 | 0.91 | 0.29 | 2.15 | 31 | **2.03** | 1.38 | 2.88 |
| Esophagus | 3 | 0.97 | 0.18 | 2.88 | 11 | **2.9** | 1.44 | 5.21 |
| Stomach | 4 | 0.57 | 0.15 | 1.46 | 12 | 1.06 | 0.55 | 1.86 |
| Small intestine | 2 | 2.02 | 0.19 | 7.44 | 7 | **3.04** | 1.21 | 6.3 |
| CRC | 27 | 1.00 | 0.66 | 1.46 | 79 | 1.12 | 0.89 | 1.4 |
| Gallbladder | 1 | 1.29 | 0 | 7.42 | 4 | **4.99** | 1.3 | 12.91 |
| Bile ducts | 1 | 0.87 | 0 | 4.97 | 3 | 2.03 | 0.38 | 6.02 |
| Pancreas | 8 | 1.36 | 0.58 | 2.69 | 5 | 0.91 | 0.29 | 2.14 |
| Lung | 20 | 0.91 | 0.55 | 1.4 | 34 | 1.26 | 0.87 | 1.76 |
| Breast |  |  |  |  |  |  |  |  |
| Prostate | 40 | 0.50 | 0.36 | 0.68 | 232 | 0.80 | 0.70 | 0.91 |
| Testis |  |  |  |  | 4 | 1.62 | 0.42 | 4.2 |
| Male genital | 1 | 1.42 | 0 | 8.15 | 4 | 1.86 | 0.48 | 4.8 |
| Kidney | 12 | **2.91** | 1.50 | 5.10 | 24 | **2.22** | 1.42 | 3.3 |
| Pelvis and ureter | 0 |  |  |  | 1 | 7.87 | 0 | 45.09 |
| Bladder | 16 | 1.02 | 0.58 | 1.66 | 79 | **1.71** | 1.35 | 2.13 |
| Melanoma | 2 | 0.29 | 0.03 | 1.08 | 15 | 0.65 | 0.36 | 1.08 |
| Skin SCC | 18 | 1.39 | 0.82 | 2.2 | 45 | **1.57** | 1.14 | 2.1 |
| Nervous system | 5 | 1.31 | 0.41 | 3.09 | 6 | 0.64 | 0.23 | 1.41 |
| Thyroid | 2 | 3.21 | 0.3 | 11.81 | 3 | 1.57 | 0.3 | 4.64 |
| Endocrine | 3 | 1.93 | 0.36 | 5.72 | 10 | 1.46 | 0.7 | 2.7 |
| Connective tissue | 1 | 0.85 | 0 | 4.9 | 1 | 0.32 | 0 | 1.83 |
| NHL | 11 | 1.49 | 0.74 | 2.68 | 26 | 1.44 | 0.94 | 2.11 |
| Hodgkin lymphoma |  |  |  |  | 3 | 2.34 | 0.44 | 6.93 |
| Myeloma | 4 | 1.23 | 0.32 | 3.18 | 10 | 1.39 | 0.66 | 2.57 |
| Leukemia | 2 | 0.3 | 0.03 | 1.12 | 14 | 0.91 | 0.5 | 1.54 |
| All | 202 | 0.97 | 0.84 | 1.12 | 700 | **1.18** | 1.09 | 1.27 |
| Gallbladder | UAT |  |  |  |  | 1 | 0.32 | 0 | 1.82 |
| Esophagus |  |  |  |  |  |  |  |  |
| Stomach | 4 | 2.10 | 0.55 | 5.42 | 5 | 1.77 | 0.56 | 4.16 |
| Small intestine | 1 | 4.16 | 0 | 23.84 | 2 | 4.02 | 0.38 | 14.79 |
| CRC | 6 | 0.89 | 0.32 | 1.94 | 20 | 1.26 | 0.77 | 1.94 |
| HCC | 4 | **4.99** | 1.3 | 12.91 | 1 | 1.29 | 0 | 7.42 |
| Bile ducts | 4 | **13.87** | 3.61 | 35.86 | 2 | 5.88 | 0.55 | 21.61 |
| Pancreas | 1 | 0.69 | 0 | 3.97 | 2 | 1.52 | 0.14 | 5.6 |
| Lung | 3 | 0.58 | 0.11 | 1.71 | 5 | 0.81 | 0.26 | 1.9 |
| Breast | 1 | 13.19 | 0.01 | 75.63 |  |  |  |  |
| Prostate | 15 | 0.78 | 0.44 | 1.3 | 39 | 0.61 | 0.44 | 0.84 |
| Testis |  |  |  |  |  |  |  |  |
| Male genital |  |  |  |  |  |  |  |  |
| Kidney | 2 | 1.96 | 0.18 | 7.19 | 2 | 0.84 | 0.08 | 3.09 |
| Pelvis and ureter |  |  |  |  |  |  |  |  |
| Bladder | 4 | 1.03 | 0.27 | 2.67 | 9 | 0.87 | 0.39 | 1.65 |
| Melanoma | 1 | 0.63 | 0 | 3.61 | 4 | 0.85 | 0.22 | 2.2 |
| Skin SCC | 2 | 0.57 | 0.05 | 2.1 | 4 | 0.59 | 0.15 | 1.53 |
| Nervous system | 1 | 1.11 | 0 | 6.38 | 1 | 0.52 | 0 | 3 |
| Thyroid |  |  |  |  |  |  |  |  |
| Endocrine |  |  |  |  | 1 | 0.72 | 0 | 4.11 |
| Connective tissue |  |  |  |  |  |  |  |  |
| NHL | 1 | 0.56 | 0 | 3.21 | 6 | 1.53 | 0.55 | 3.36 |
| Hodgkin lymphoma |  |  |  |  |  |  |  |  |
| Myeloma |  |  |  |  |  |  |  |  |
| Leukemia | 2 | 1.24 | 0.12 | 4.57 | 4 | 1.21 | 0.31 | 3.13 |
| All | 56 | 1.07 | 0.81 | 1.39 | 111 | 0.85 | 0.70 | 1.03 |
| Bile ducts | UAT | 1 | 0.41 | 0 | 2.36 | 7 | 1.3 | 0.52 | 2.69 |
| Esophagus |  |  |  |  | 1 | 0.77 | 0 | 4.41 |
| Stomach | 5 | 1.55 | 0.49 | 3.64 | 1 | 0.25 | 0 | 1.4 |
| Small intestine | 3 | **6.51** | 1.23 | 19.28 | 5 | **5.94** | 1.87 | 13.96 |
| CRC | 10 | 0.78 | 0.37 | 1.44 | 37 | 1.41 | 0.99 | 1.94 |
| HCC | 3 | 2.03 | 0.38 | 6.02 | 1 | 0.87 | 0 | 4.97 |
| Gallbladder | 2 | 5.88 | 0.55 | 21.61 | 4 | **13.87** | 3.61 | 35.86 |
| Pancreas | 8 | **3.07** | 1.31 | 6.08 | 6 | **3.18** | 1.14 | 6.96 |
| Lung | 4 | 0.41 | 0.11 | 1.06 | 5 | 0.54 | 0.17 | 1.27 |
| Breast |  |  |  |  | 1 | 2.88 | 0 | 16.48 |
| Prostate | 27 | 0.7 | 0.46 | 1.02 | 74 | 0.68 | 0.53 | 0.85 |
| Testis |  |  |  |  | 1 | 1.22 | 0 | 7 |
| Male genital |  |  |  |  | 1 | 1.26 | 0 | 7.2 |
| Kidney | 4 | 2.16 | 0.56 | 5.58 | 3 | 0.77 | 0.14 | 2.27 |
| Pelvis and ureter |  |  |  |  |  |  |  |  |
| Bladder | 2 | 0.27 | 0.03 | 1 | 18 | 1.03 | 0.61 | 1.63 |
| Melanoma | 1 | 0.31 | 0 | 1.77 | 6 | 0.69 | 0.25 | 1.51 |
| Skin SCC | 3 | 0.44 | 0.08 | 1.31 | 11 | 0.94 | 0.46 | 1.68 |
| Nervous system |  |  |  |  | 3 | 0.91 | 0.17 | 2.69 |
| Thyroid | 1 | 3.61 | 0 | 20.69 |  |  |  |  |
| Endocrine |  |  |  |  | 2 | 0.81 | 0.08 | 2.97 |
| Connective tissue | 1 | 1.83 | 0 | 10.48 | 1 | 0.86 | 0 | 4.94 |
| NHL | 2 | 0.59 | 0.06 | 2.16 | 10 | 1.53 | 0.73 | 2.82 |
| Hodgkin lymphoma |  |  |  |  | 1 | 2.26 | 0 | 12.94 |
| Myeloma |  |  |  |  | 4 | 1.54 | 0.4 | 3.97 |
| Leukemia | 3 | 0.97 | 0.18 | 2.87 | 4 | 0.72 | 0.19 | 1.85 |
| All | 83 | 0.84 | 0.67 | 1.04 | 213 | 0.96 | 0.84 | 1.10 |

N= patient number, SIR standardized incidence ratio, 95%CI 95% confidence interval, SPC second primary cancer, UAT upper aerodigestive tract, CRC colorectal cancer, HCC Hepatocellular carcinoma, NHL non-Hodgkin lymphoma.

Bolding shows that the 95%CI does not overlap with 1.00.

Supplementary Table 2. Female risks of SPCs after hepatobiliary cancers and these cancers as SPCs

| Subtype | Cance rsite | SPC after hepatobiliary cancer | | | | hepatobiliary cancer as SPC | | | |
| --- | --- | --- | --- | --- | --- | --- | --- | --- | --- |
| N | SIR | 95% CI | | N | SIR | 95% CI | |
| HCC | UAT | 3 | 2.43 | 0.46 | 7.21 | 9 | **2.59** | 1.17 | 4.93 |
| Esophagus |  |  |  |  |  |  |  |  |
| Stomach | 3 | 1.41 | 0.27 | 4.19 | 6 | 1.73 | 0.62 | 3.79 |
| Small intestine | 1 | 2.36 | 0 | 13.52 | 3 | 2.95 | 0.56 | 8.73 |
| CRC | 11 | 0.97 | 0.48 | 1.74 | 38 | 1.2 | 0.85 | 1.65 |
| Gallbladder | 7 | **6.64** | 2.63 | 13.75 | 2 | 1.56 | 0.15 | 5.74 |
| Bile ducts | 1 | 1.62 | 0 | 9.3 | 1 | 1.44 | 0 | 8.26 |
| Pancreas | 6 | 2 | 0.72 | 4.39 | 2 | 0.71 | 0.07 | 2.62 |
| Lung | 7 | 1.02 | 0.41 | 2.12 | 10 | 1.12 | 0.53 | 2.07 |
| Breast | 9 | 0.47 | 0.21 | 0.9 | 93 | 1.09 | 0.88 | 1.34 |
| Cervix |  |  |  |  | 4 | 0.97 | 0.25 | 2.5 |
| Endometrium | 6 | 1.16 | 0.42 | 2.54 | 26 | 1.18 | 0.77 | 1.73 |
| Ovary | 4 | 1.36 | 0.35 | 3.51 | 7 | 0.81 | 0.32 | 1.68 |
| Female genital |  |  |  |  | 3 | 1.3 | 0.24 | 3.84 |
| Kidney | 4 | 2.93 | 0.76 | 7.58 | 8 | 1.93 | 0.82 | 3.82 |
| Pelvis and ureter |  |  |  |  | 1 | 0.64 | 0 | 3.68 |
| Bladder | 1 | 0.44 | 0 | 2.51 | 8 | 1.18 | 0.51 | 2.34 |
| Melanoma | 2 | 0.74 | 0.07 | 2.74 | 10 | 0.93 | 0.44 | 1.71 |
| Skin SCC | 9 | 2.03 | 0.92 | 3.86 | 13 | 1.15 | 0.61 | 1.98 |
| Nervous system | 4 | 1.89 | 0.49 | 4.88 | 8 | 1.13 | 0.48 | 2.23 |
| Thyroid | 3 | 5.09 | 0.96 | 15.07 | 6 | 2.6 | 0.94 | 5.7 |
| Endocrine | 4 | 2.56 | 0.66 | 6.61 | 12 | 1.45 | 0.75 | 2.54 |
| Connective tissue |  |  |  |  | 3 | 2.42 | 0.46 | 7.16 |
| NHL | 3 | 1.03 | 0.19 | 3.06 | 15 | **1.92** | 1.07 | 3.17 |
| Hodgkin lymphoma |  |  |  |  |  |  |  |  |
| Myeloma |  |  |  |  | 2 | 0.68 | 0.06 | 2.49 |
| Leukemia | 1 | 0.41 | 0 | 2.34 | 7 | 1.18 | 0.47 | 2.45 |
|  | All | 95 | 1.20 | 0.97 | 1.47 | 312 | **1.22** | 1.09 | 1.36 |
| Gallbladder | UAT | 1 | 0.59 | 0 | 3.39 | 5 | 1.32 | 0.42 | 3.11 |
| Esophagus | 1 | 1.22 | 0 | 7.01 |  |  |  |  |
| Stomach | 3 | 0.95 | 0.18 | 2.81 | 1 | 0.24 | 0 | 1.37 |
| Small intestine | 2 | 3.37 | 0.32 | 12.4 | 4 | 3.48 | 0.9 | 8.99 |
| CRC | 13 | 0.8 | 0.42 | 1.37 | 24 | 0.67 | 0.43 | 0.99 |
| HCC | 2 | 1.56 | 0.15 | 5.74 | 7 | **6.64** | 2.63 | 13.75 |
| Bile ducts | 2 | 2.22 | 0.21 | 8.17 |  |  |  |  |
| Pancreas | 3 | 0.7 | 0.13 | 2.06 | 7 | 2.06 | 0.82 | 4.28 |
| Lung | 4 | 0.44 | 0.11 | 1.13 | 4 | 0.4 | 0.11 | 1.05 |
| Breast | 13 | 0.52 | 0.28 | 0.89 | 76 | 0.84 | 0.66 | 1.05 |
| Cervix | 1 | 0.7 | 0 | 3.99 | 3 | 0.71 | 0.13 | 2.1 |
| Endometrium | 6 | 0.85 | 0.31 | 1.87 | 27 | 1.11 | 0.73 | 1.62 |
| Ovary | 7 | 1.71 | 0.68 | 3.54 | 9 | 0.93 | 0.42 | 1.78 |
| Female genital | 1 | 0.78 | 0 | 4.5 | 1 | 0.38 | 0 | 2.15 |
| Kidney | 7 | **3.62** | 1.43 | 7.49 | 2 | 0.43 | 0.04 | 1.56 |
| Pelvis and ureter |  |  |  |  | 1 | 0.58 | 0 | 3.34 |
| Bladder | 1 | 0.31 | 0 | 1.77 | 7 | 0.92 | 0.37 | 1.92 |
| Melanoma | 3 | 0.87 | 0.16 | 2.57 | 10 | 0.9 | 0.43 | 1.67 |
| Skin SCC | 4 | 0.6 | 0.16 | 1.55 | 15 | 1.18 | 0.66 | 1.95 |
| Nervous system | 1 | 0.36 | 0 | 2.05 | 6 | 0.81 | 0.29 | 1.78 |
| Thyroid | 1 | 1.31 | 0 | 7.52 |  |  |  |  |
| Endocrine | 1 | 0.48 | 0 | 2.75 | 8 | 0.89 | 0.38 | 1.75 |
| Connective tissue | 2 | 3.22 | 0.3 | 11.85 | 2 | 1.46 | 0.14 | 5.37 |
| NHL |  |  |  |  | 4 | 0.46 | 0.12 | 1.19 |
| Hodgkin lymphoma |  |  |  |  |  |  |  |  |
| Myeloma |  |  |  |  | 2 | 0.59 | 0.06 | 2.16 |
| Leukemia | 2 | 0.59 | 0.06 | 2.17 | 7 | 1.07 | 0.42 | 2.22 |
| All | 87 | 0.80 | 0.64 | 0.98 | 240 | 0.86 | 0.75 | 0.97 |
| Bile ducts | UAT | 1 | 0.97 | 0 | 5.57 | 4 | 1.52 | 0.4 | 3.93 |
| Esophagus |  |  |  |  |  |  |  |  |
| Stomach | 1 | 0.59 | 0 | 3.38 | 1 | 0.4 | 0 | 2.27 |
| Small intestine |  |  |  |  | 1 | 1.31 | 0 | 7.48 |
| CRC | 9 | 0.92 | 0.42 | 1.76 | 24 | 0.98 | 0.63 | 1.46 |
| HCC | 1 | 1.44 | 0 | 8.26 | 1 | 1.62 | 0 | 9.3 |
| Gallbladder |  |  |  |  | 2 | 2.22 | 0.21 | 8.17 |
| Pancreas | 6 | 2.5 | 0.9 | 5.49 | 2 | 1.03 | 0.1 | 3.79 |
| Lung | 5 | 0.91 | 0.29 | 2.15 | 4 | 0.63 | 0.17 | 1.64 |
| Breast | 15 | 0.94 | 0.53 | 1.56 | 79 | 1.24 | 0.98 | 1.54 |
| Cervix |  |  |  |  | 4 | 1.42 | 0.37 | 3.67 |
| Endometrium | 2 | 0.46 | 0.04 | 1.68 | 21 | 1.25 | 0.77 | 1.91 |
| Ovary | 4 | 1.66 | 0.43 | 4.3 | 2 | 0.32 | 0.03 | 1.18 |
| Female genital |  |  |  |  | 4 | 2.28 | 0.59 | 5.89 |
| Kidney | 2 | 1.82 | 0.17 | 6.68 | 4 | 1.31 | 0.34 | 3.4 |
| Pelvis and ureter |  |  |  |  | 1 | 0.89 | 0 | 5.08 |
| Bladder | 1 | 0.51 | 0 | 2.92 | 9 | 1.71 | 0.78 | 3.26 |
| Melanoma | 2 | 0.88 | 0.08 | 3.22 | 4 | 0.49 | 0.13 | 1.27 |
| Skin SCC | 3 | 0.72 | 0.14 | 2.12 | 12 | 1.24 | 0.64 | 2.18 |
| Nervous system | 2 | 1.21 | 0.11 | 4.45 | 2 | 0.4 | 0.04 | 1.46 |
| Thyroid | 1 | 2.19 | 0 | 12.53 | 1 | 0.62 | 0 | 3.55 |
| Endocrine | 1 | 0.79 | 0 | 4.5 | 6 | 0.97 | 0.35 | 2.13 |
| Connective tissue |  |  |  |  |  |  |  |  |
| NHL | 1 | 0.42 | 0 | 2.39 | 4 | 0.69 | 0.18 | 1.78 |
| Hodgkin lymphoma |  |  |  |  |  |  |  |  |
| Myeloma |  |  |  |  | 1 | 0.47 | 0 | 2.67 |
| Leukemia | 1 | 0.49 | 0 | 2.81 | 9 | 2.01 | 0.91 | 3.83 |
| All | 64 | 0.95 | 0.73 | 1.21 | 207 | 1.07 | 0.93 | 1.23 |

N= patient number, SIR standardized incidence ratio, 95%CI 95% confidence interval, SPC second primary cancer, UAT upper aerodigestive tract, CRC colorectal cancer, HCC Hepatocellular carcinoma, NHL non-Hodgkin lymphoma.

Bolding shows that the 95%CI does not overlap with 1.00.
